EXPRESSION OF CONCERN

## Expression of Concern: Economic policy uncertainty, intra-industry trade, and China's mechanical and electrical product exports

The *PLOS One* Editors

After this article [1,2] was published, the *PLOS One* Editors identified concerns about the article's peer review and compliance with the PLOS Authorship policy. We regret that the issues were not addressed prior to the article's publication.

In light of the cumulative issues, the *PLOS One* Editors issue this Expression of Concern. Readers are advised to interpret the article [1] with caution.

### References

1. Liu D, Zhu X, Yu H. Economic policy uncertainty, intra-industry trade, and China's mechanical and electrical product exports. *PLoS One*. 2024;19(1):e0290866. <https://doi.org/10.1371/journal.pone.0290866> PMID: [38236940](https://pubmed.ncbi.nlm.nih.gov/38236940/)
2. Liu D, Zhu X, Yu H. Correction: Economic policy uncertainty, intra-industry trade, and China's mechanical and electrical product exports. *PLoS One*. 2024;19(6):e0305104. <https://doi.org/10.1371/journal.pone.0305104> PMID: [38833440](https://pubmed.ncbi.nlm.nih.gov/38833440/)

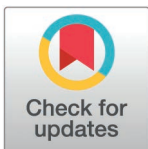

### OPEN ACCESS

**Citation:** The *PLOS One* Editors (2026) Expression of Concern: Economic policy uncertainty, intra-industry trade, and China's mechanical and electrical product exports. *PLoS One* 21(5): e0349909. <https://doi.org/10.1371/journal.pone.0349909>

**Published:** May 28, 2026

**Copyright:** © 2026 The *PLOS One* Editors. This is an open access article distributed under the terms of the [Creative Commons Attribution License](https://creativecommons.org/licenses/by/4.0/), which permits unrestricted use, distribution, and reproduction in any medium, provided the original author and source are credited.
